# Supplementary material
Source: Elsevier journal article supplement (https://comptes-rendus.academie-sciences.fr/chimie/article/10.1016/j.crci.2011.05.002/file/attach/mmc1.pdf)
Supplement: mmc1 [file mmc1.pdf]

## Supporting Information

### Further studies of $[\text{Ni}_4(\text{DAniDANy})_4]$ and Its One-Electron Oxidation Product : Metal-Metal Sigma Bonding in $\text{Ni}_4^{9+}$ Complex

Gin-Chen Huang,<sup>a</sup> Shao-An Hua,<sup>a</sup> Isiah Po-Chun Liu,<sup>a,\*</sup> Chih-Hsien Chien,<sup>a</sup> Jau-Huei Kuo,<sup>a</sup> Gene-Hsiang Lee,<sup>a</sup> and Shie-Ming Peng<sup>a,b,\*</sup>

<sup>a</sup>*Department of Chemistry, National Taiwan University, Taipei, Taiwan*

<sup>b</sup>*Institute of Chemistry, Academia Sinica, Taipei, Taiwan*

#### Materials

All reagents and solvents were purchased from commercial sources and were used as received unless otherwise noted. The  $\text{H}_2\text{DAniDANy}$  ligand and tetranickel string,  $[\text{Ni}_4(\text{DAniDANy})_4]$  (**1**), were prepared according to the literature procedures.[1]

#### Physical Measurements

FAB mass spectra were obtained with a JEOL HX-110 HF double-focusing spectrometer operating in the positive ion detection mode. Magnetic susceptibility values were collected with a Quantum external magnetic field of 3000 G. EPR spectra were monitored with a Bruker EMX-10. Samples were run at 9.49 GHz (X-band) at 77 K. Electrochemistry measurements were carried out with a CH Instruments equipment (Model 750A) with the use of  $\text{CH}_2\text{Cl}_2$  as the solvent with 0.1 TBAP and 1 mM analytes. Cyclic voltammetry was recorded with a homemade three-electrode cell equipped with a BAS glossy carbon ( $0.07 \text{ cm}^2$ ) disk as the working electrode, a platinum wire as the auxiliary electrode, and a homemade Ag/AgCl (saturated) reference electrode. The reference electrode was separated from the bulk solution by a

double junction filled with electrolyte solution. Potentials are reported versus Ag/AgCl (saturated) and referenced to the ferrocene–ferrocenium ( $[\text{Cp}_2\text{Fe}]/[\text{Cp}_2\text{Fe}]^+$ ) couple, which occurs at  $E_{1/2} = +0.54 \text{ V}$  vs. Ag/AgCl (saturated). The working electrode was polished with 0.03  $\mu\text{m}$  alumina on Buehler felt pads and was subjected to ultrasound for 1 min prior to each experiment. The reproducibility of individual potential values was within  $\pm 5 \text{ mV}$ . Optically transparent thin-layer electrochemical electrode (OTTLE) spectra were accomplished with the use of a 1 mm thick UV cell, a 100-mesh platinum gauze as working electrode, a platinum wire as auxiliary electrode, and a Ag/AgCl (saturated) reference electrode.

## Synthesis

### $[\text{Ni}_4(\mu_4\text{-DAniDANy})_4](\text{PF}_6)_4$ (**2**):

In a flask, compound **1** (171.6 mg, 0.1 mol) and ferrocenium hexafluorophosphate (33.1 mg, mol) were dissolved in  $\text{CH}_2\text{Cl}_2$  (50 mL) and stirred for 1 h. The mixture was then filtered. The filtrate was condensed to 5 mL and precipitated with ether. Single crystals suitable for X-ray diffraction studies were obtained via layer of  $\text{CHCl}_2\text{CH}_2\text{Cl}$  (1,1',2-trichloroethane) with hexane. Yield : 101 mg, 53%. MS(FAB)  $m/z$ : 1715 ( $[\text{Ni}_4(\text{DAniDANy})_4]^+$ ).

## X-Ray crystallographic determinations

The crystals were mounted on a glass fiber. Crystal data were collected on a NONIUS Kappa CCD diffractometer with monochromatized  $\text{MoK}\alpha$  radiation ( $\lambda = 0.71073 \text{ \AA}$ ) at  $T = 150(2) \text{ K}$  for **2**. Cell parameters were retrieved and refined using *DENZOSMN* software on all observed reflections. Data reduction was performed with the *DENZO-SMN* software.[2] An empirical absorption was based on the symmetry-equivalent reflections and absorption corrections were applied with the

SORTAV program.[2] All the structures were solved by using the *SHELXS-97* and refined with *SHELXL-97* by full-matrix least squares on  $F^2$  values.[2] Hydrogen atoms were fixed at calculated positions and refined using a riding mode. Asymmetric unit in the crystal structure contains 1/4  $[\text{Ni}_4(\text{DAniDANy})_4]^+$  cation. The  $[\text{Ni}_4(\text{DAniDANy})_4]^+$  cation locates at two-fold axis and one mirror plane with 50% disorder of a spiral set of four  $\text{DAniDANy}^{2-}$  ligands.

**Table S1:** Crystal data and structure refinement for  $[\text{Ni}_4(\mu_4\text{-DAniDANy})_4](\text{PF}_6)$  (**2**)

| $2 \cdot 4\text{CHCl}_2\text{CH}_2\text{Cl}$      |                                                                                   |
|---------------------------------------------------|-----------------------------------------------------------------------------------|
| formula                                           | $\text{C}_{96}\text{H}_{84}\text{Cl}_{12}\text{F}_6\text{Ni}_4\text{O}_8\text{P}$ |
| fw                                                | 2395.00                                                                           |
| Temperature (K)                                   | 150(2)                                                                            |
| crystal system                                    | Orthorhombic                                                                      |
| space group                                       | $C2/m$                                                                            |
| a (Å)                                             | 16.9785(9)                                                                        |
| b (Å)                                             | 22.6333(12)                                                                       |
| c (Å)                                             | 13.0677(7)                                                                        |
| $\alpha$ (°)                                      | 90                                                                                |
| $\beta$ (°)                                       | 90.7910(10)                                                                       |
| $\gamma$ (°)                                      | 90                                                                                |
| V (Å <sup>3</sup> ) / Z                           | 5021(2) / 2                                                                       |
| $R_F, R_{wF}^2$ ( $I > 2\sigma(I)$ ) <sup>a</sup> | 0.0902, 0.2340                                                                    |
| $R_F, R_{wF}^2$ (all data) <sup>a</sup>           | 0.1257, 0.2622                                                                    |

$$^a R_F = \sum |F_o - F_c| / \sum |F_o|; R_{wF}^2 = [\sum w |F_o^2 - F_c^2|^2 / \sum w F_o^4]^{1/2}$$

**Calculations:** Calculations on compounds **1** and **2** have been carried out using the Density Functional Theory (DFT) in the ORCA software.[3] Full geometry optimizations were carried out with the BP86 functional in the gas phase [4]. The TZVP (for Ni and N atoms), and SVP (for other atoms) basis sets were applied in combination with the TZV/J (Ni and N atoms) and SV/J (remaining) auxiliary basis sets.[5] The RI approximation was used to accelerate the calculations.[5, 6]

## References

- [1] X. López, M.Y. Huang, G.C. Huang, S.M. Peng, F.Y. Li, M. Bénard, M.-M. Rohmer, *Inorg. Chem.* 45 (2006) 9075.
- [2] (a) Z. Otwinowski, W. Minor, *Methods Enzymol.* 276 (1997) 307;  
(b) R.H. Blessing, *Acta Crystallogr. Sect. A* 51 (1995) 33;  
(c) G.M. Sheldrick, *Acta Crystallogr. Sect. A* 46 (1990) 467;  
(d) G.M. Sheldrick, SHELXL-97 University of Göttingen, Germany, 1997.
- [3] F. Neese, ORCA-an ab initio, Density Functional and Semiempirical Program Package Version 2.8-20 2010 ed.; Universität Bonn: Bonn, Germany, 2010.
- [4] (a) A.D. Becke, *Phys. Rev.* 388 (1988) 3098;  
(b) J.P. Perdew, *Phys. Rev.* 33 (1986) 8822.
- [5] (a) A. Schäfer, C.Huber, R. Ahlrichs, *J. Chem. Phys.* 100 (1994) 5829;  
(b) K. Eichkorn, F. Weigend, O. Treutler, R. Ahlrichs, *Theor. Chim. Acta* 97 (1997) 119;  
(c) K. Eichkorn, O. Treutler, H. Öhm, M. Häser, R. Ahlrichs, *Chem. Phys. Lett.* 240 (1995) 283.
- [6] K. Eichkorn, O. Treutler, H. Öhm, M. Häser, R. Ahlrichs, *Chem. Phys. Lett.* 242 (1995) 652.
